# Supplementary material for: Dermal Pericytes Exhibit Declined Ability to Promote Human Skin Regeneration with Ageing in 3D Organotypic Culture Models
Source: MDPI journal article supplement (doi:10.3390/cells10113051), 2021-11-06
Supplement: s1 [file s1]

## Appendix B: Supplementary Figure S1:

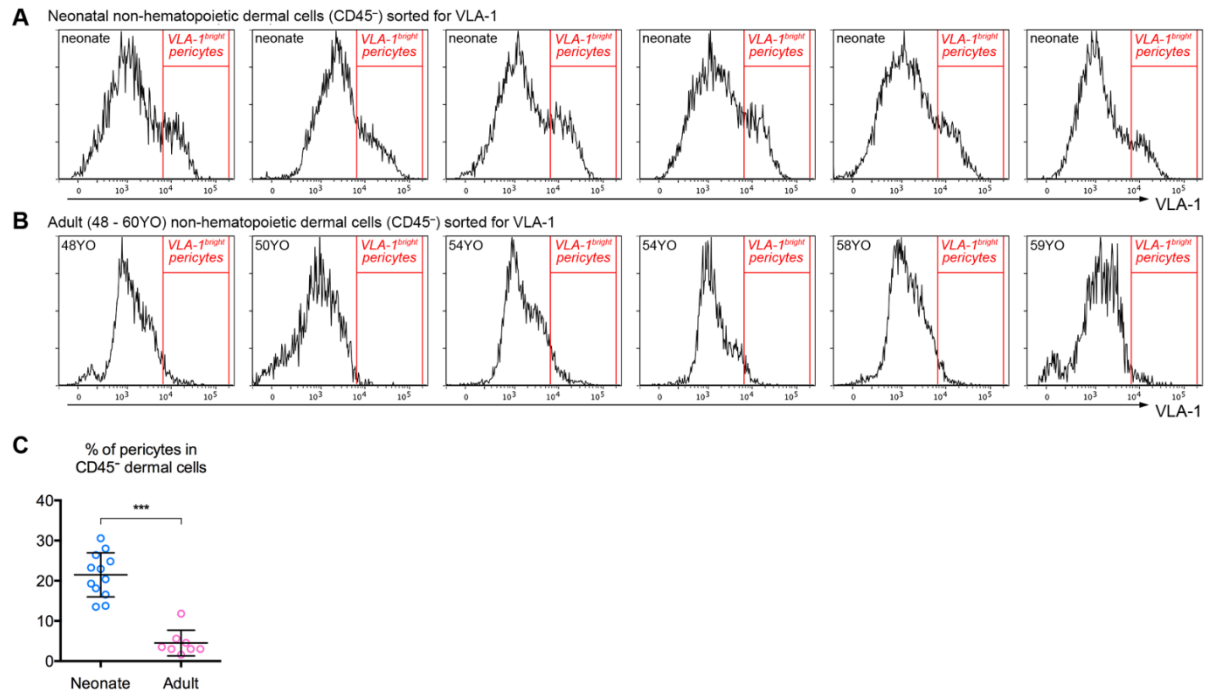

**Supplementary Figure S1: Flow cytometric analysis to detect the incidence of dermal pericytes in neonatal versus aged skin.** A, B. Dual staining for CD45 and CD49a (VLA-1) and analysis of the CD45<sup>-</sup> fraction of dermal cells illustrates a higher incidence of CD49a<sup>bri</sup> skin pericytes in neonatal foreskin (A, n=6) than aged 48-59yo adult skin (B, n=6). C. Quantitation of pooled data from A, B showing lower incidence of pericytes in aged skin versus neonatal skin (\*\*=p<.001). Error bars represent mean  $\pm$  SD.

## Supplementary Figure S2:

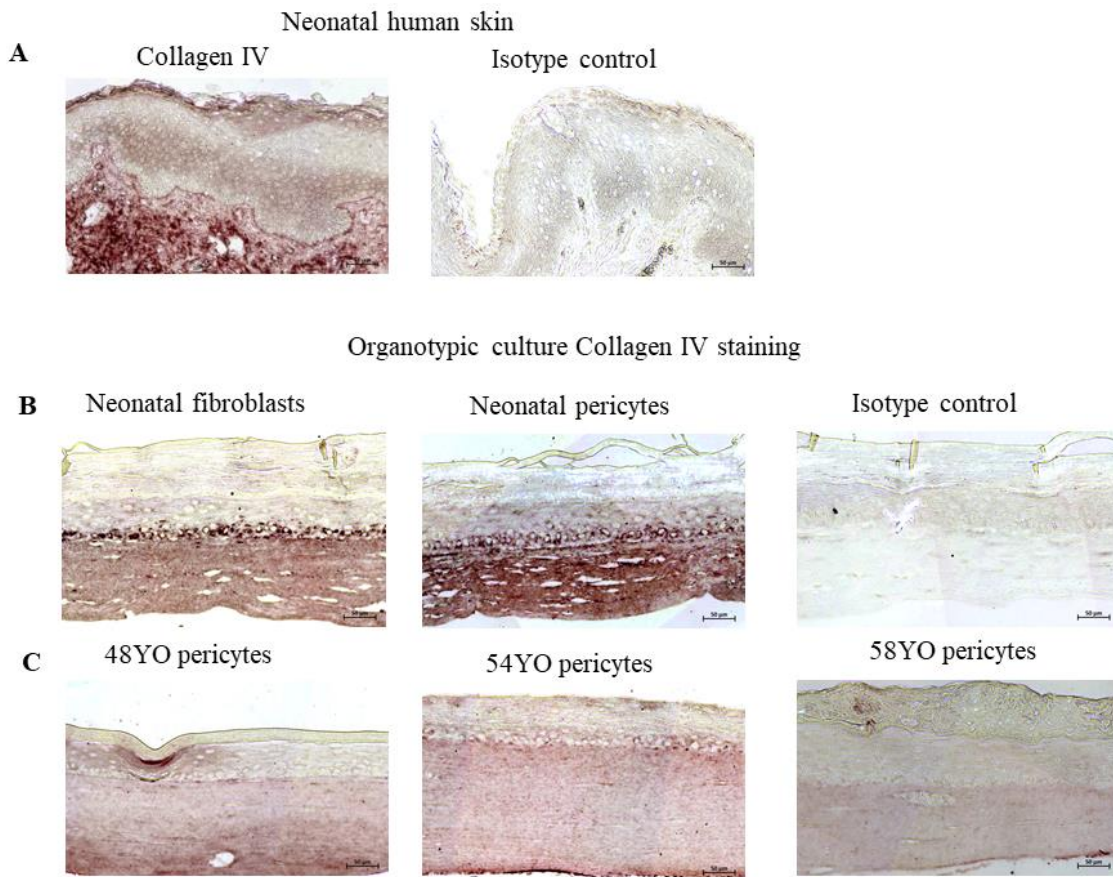

**Supplementary Figure S2: Anti-Collagen IV staining of organotypic cultures populated with neonatal dermal fibroblasts, neonatal dermal pericytes or aged dermal pericytes. A.** Anti-Collagen IV staining on neonatal human skin and rabbit IgG isotype control. **B.** Anti-Collagen IV staining on organotypic cultures with neonatal dermal pericytes or fibroblasts and rabbit IgG isotype control. **C.** Anti-Collagen IV staining organotypic cultures generated with aged pericytes from 48, 54 and 58YOI pericytes.
